# Supplementary material
Source: PubMed Central journal article supplement (PMC5167650)
Supplement: NIHMS827541-supplement-Supp_info.pdf [file NIHMS827541-supplement-Supp_info.pdf]

**Supplemental Information for:**  
**The NMR Solution Structure and Function of RPA3313: A Conserved  
Protein from *Rhodopseudomonas palustris***

Jonathan Catazaro, Austin J. Lowe, Ronald L. Cerny, and Robert Powers\*

*Department of Chemistry, University of Nebraska-Lincoln, Lincoln, NE, 68588-0304*

*USA*

**TABLE OF CONTENTS**

**Figure S-1.** A 2D  $^1\text{H}$ - $^{15}\text{N}$  HSQC NMR spectrum of RPA3313 with peaks labeled according to their respective residue numbers or side-chain identification. Unlabeled peaks correspond to the 6x His tag, which was not included in the structure generation or analysis.

**Figure S-2.** Plot of the size exclusion chromatogram of RPA3313. The purified protein was run on a Superdex 75 gravity flow column to determine the oligomeric state of the protein. Only a single peak for the monomer of RPA3313 was observed.

**Figure S-3.** Intact mass analysis using ESI-MS of RPA3313 from Figure 1. ESI-MS confirms the major state of RPA3313 is a monomer.

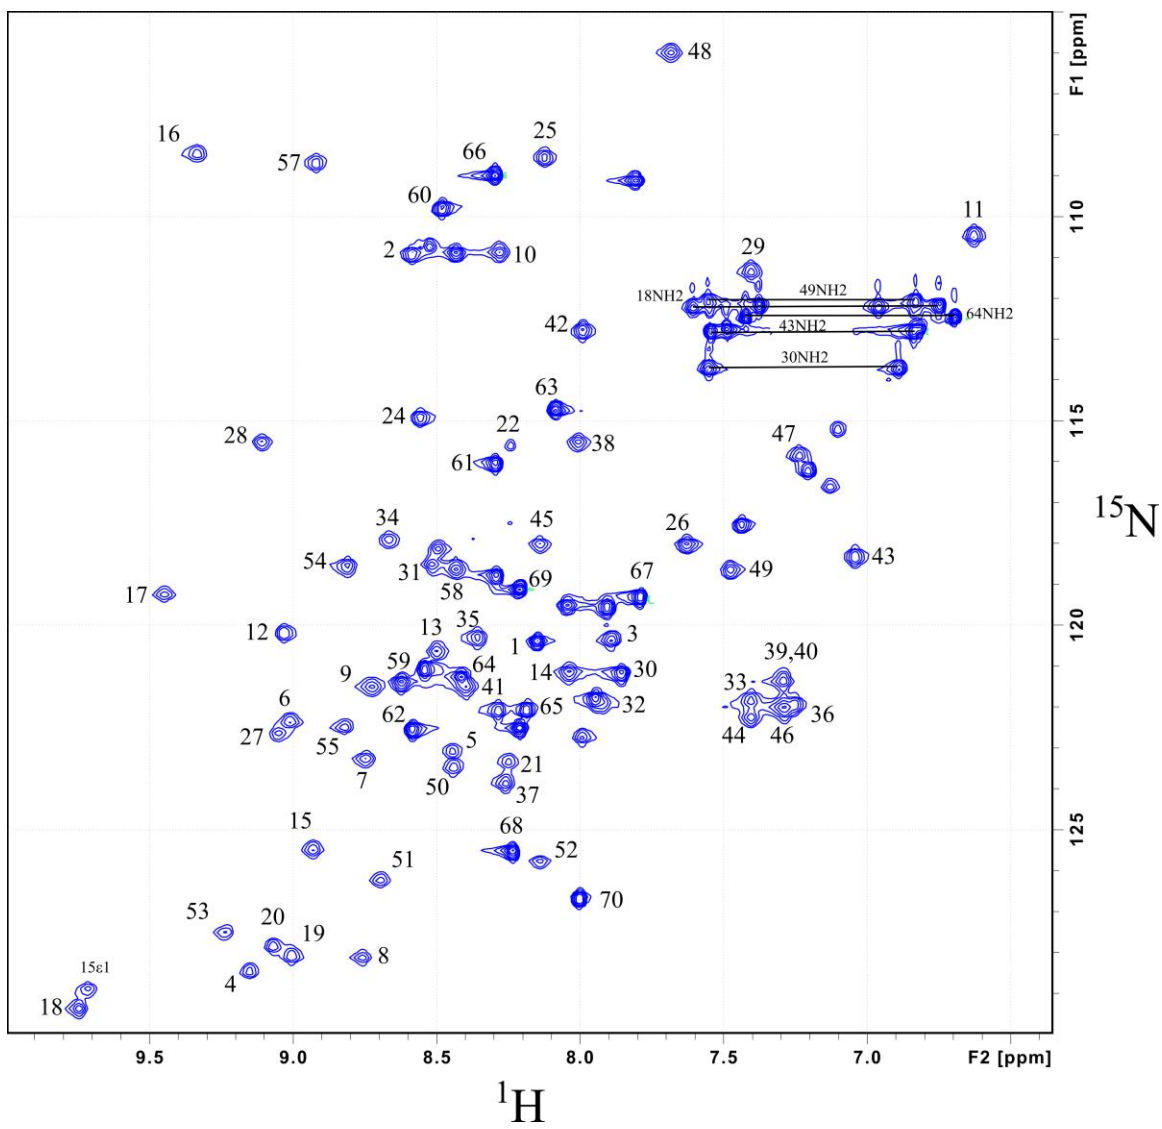

**Figure S-1**

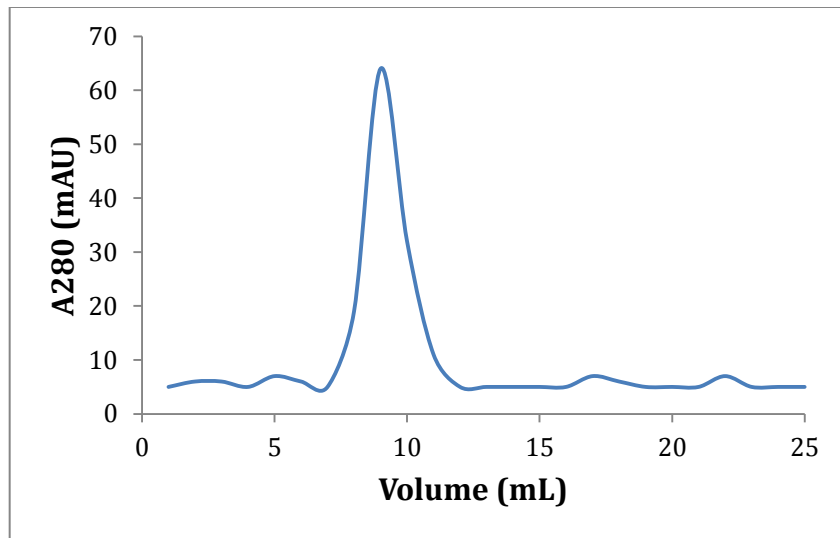

**Figure S-2**

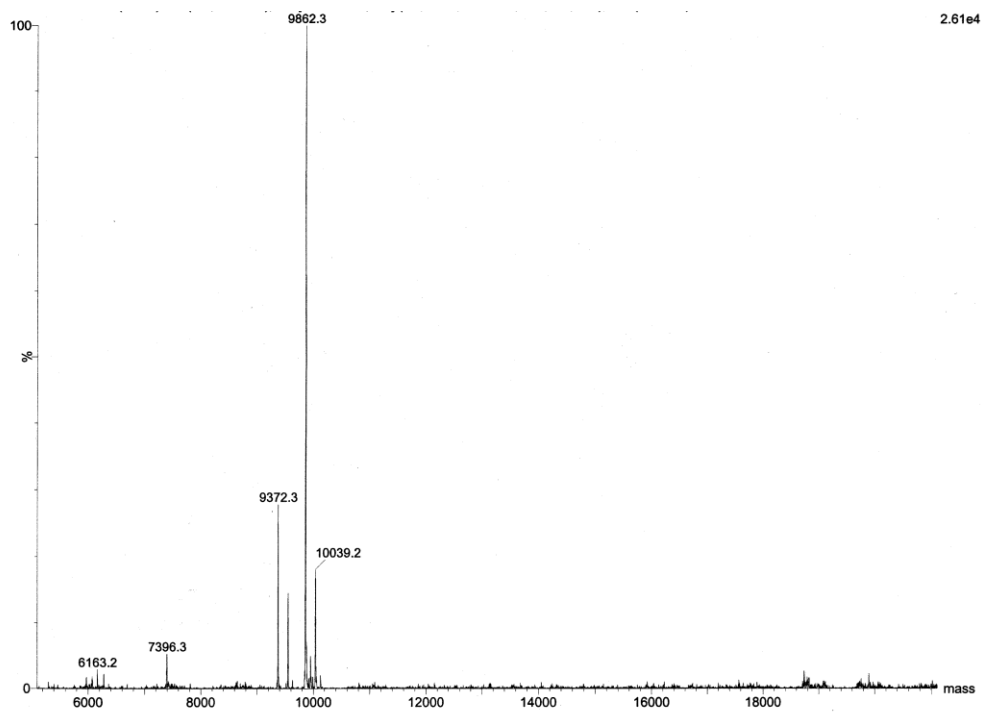

**Figure S-3**
